# Supplementary material for: Oral nutrition supplements and between-meal snacks for nutrition therapy in patients with COPD identified as at nutritional risk: a randomised feasibility trial
Source: PubMed Central journal article supplement — BMJ Open Respir Res. 2019 Jan 3;6(1):e000349. doi: 10.1136/bmjresp-2018-000349 (PMC6326325; doi:10.1136/bmjresp-2018-000349), 2019-01-03
Supplement: bmjresp-2018-000349supp002.pdf [file bmjresp-2018-000349supp002.pdf]

**Supplementary table 1** Measures of lung function, functional measures and muscle strength in follow up (3 and 12 months).

|                                                | ONS |             |                          |             | Snacks |             |                         |             |
|------------------------------------------------|-----|-------------|--------------------------|-------------|--------|-------------|-------------------------|-------------|
|                                                | n   | Baseline    | 3 months                 | 12 months   | n      | Baseline    | 3 months                | 12 months   |
| <b>Lung function</b>                           |     |             |                          |             |        |             |                         |             |
| FEV <sub>1</sub> (%)                           | 14  | 36.3 (14.0) | 39.0 (12.6)              | 36.6 (14.9) | 12     | 39.9 (8.1)  | 41.8 (6.1)              | 37.3 (6.9)  |
| FVC (%)                                        | 14  | 63.3 (12.7) | 73.4 (16.3) <sup>1</sup> | 66.7 (13.2) | 12     | 69.3 (23.0) | 71.3 (18.4)             | 68.2 (15.2) |
| <b>Functional measures and muscle strength</b> |     |             |                          |             |        |             |                         |             |
| 6 MWD (m)                                      | 13  | 236 (132)   | 266 (157)                | 258 (173)   | 9      | 212 (88)    | 257 (119)               | 259 (112)   |
| TUG (sec)                                      | 15  | 15.4 (7.7)  | 12.9 (5.7) <sup>1</sup>  | 13.8 (7.4)  | 11     | 14.3 (3.9)  | 12.5 (3.0) <sup>1</sup> | 13.7 (5.8)  |
| 30sec chair stand (n)                          | 15  | 4.2 (4.3)   | 5.5 (5.4)                | 5.4 (5.0)   | 12     | 5.7 (3.3)   | 5.8 (2.9)               | 6.0 (2.5)   |
| HGS (kg)                                       | 16  | 15.0 (9.0)  | 15.4 (10.2)              | 12.4 (9.2)  | 13     | 14.3 (6.9)  | 13.6 (5.8)              | 13.9 (5.6)  |

Intention-to-treat analysis. Data shown as mean (SD). ONS, oral nutritional supplements. FEV<sub>1</sub>, forced expiratory volume in 1 s. FVC, forced vital capacity. 6MWD, six minute walking distance. TUG, time up and go. HGS, hand grip strength.

<sup>1</sup> Significantly different from baseline, p<0.05.
